# Supplementary material for: Microwave-assisted cation exchange toward synthesis of near-infrared emitting PbS/CdS core/shell quantum dots with significantly improved quantum yields through a uniform growth path
Source: Royal Society of Chemistry journal article supplement (doi:10.1039/c3nr02181e), 2013-01-01
Supplement: c3nr02181e.pdf [file c3nr02181e.pdf]

## Supporting information for

### Microwave-assisted cation exchange toward synthesis of near-infrared emitting PbS/CdS core/shell quantum dots with significantly improved quantum yields through a uniform growth path

Fuqiang Ren, Haiguang Zhao, Fiorenzo Vetrone, Dongling Ma\*

Institut National de la Recherche Scientifique - Énergie, Matériaux et Télécommunications, Université du Québec,  
1650 Boul. Lionel-Boulet, Varennes, Québec J3X 1S2, Canada

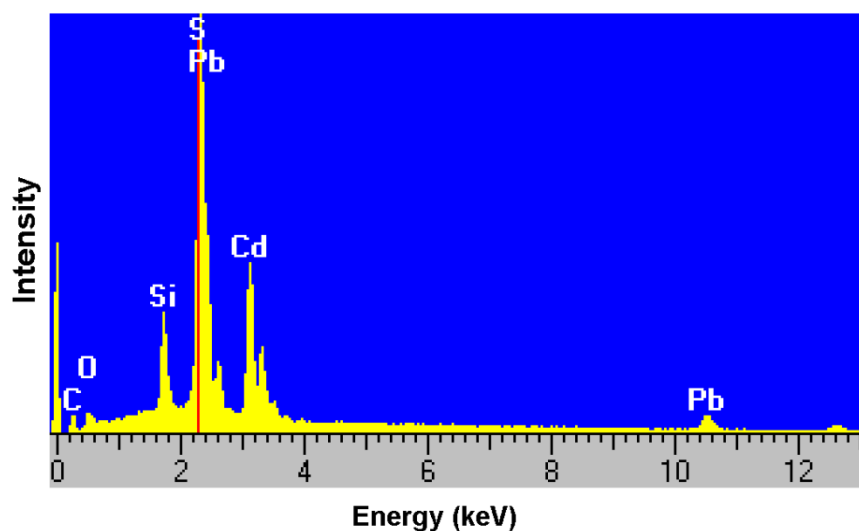

Figure S1. EDX spectrum confirming the presence of all expected elements (Pb, Cd and S) in the PbS/CdS core/shell QDs. Note that the silicon peak comes from the substrate.

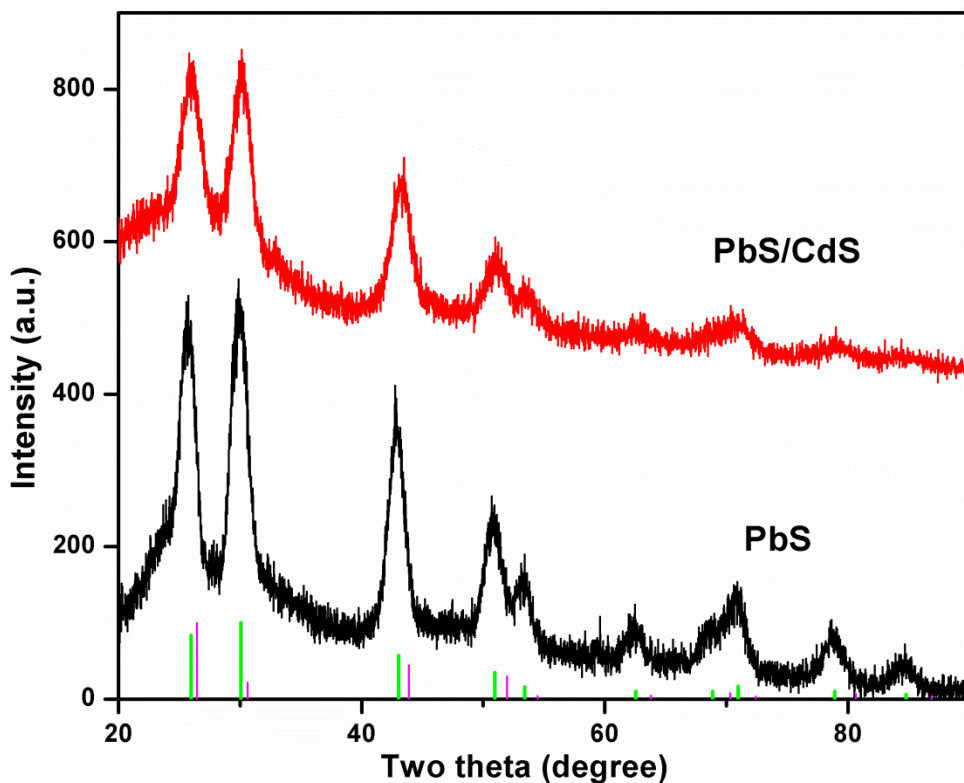

Figure S2. XRD patterns of PbS and PbS/CdS QDs. The JCPDS card files for PbS (05-0592, green line) and for CdS (01 089 0440, magenta line) are shown below the spectra for identification.

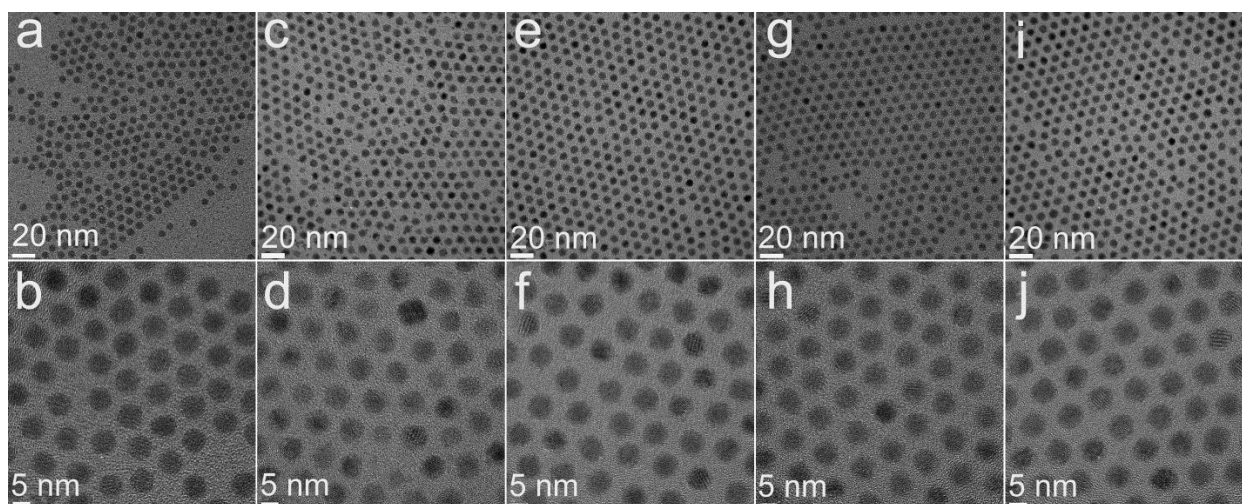

Figure S3. TEM images of PbS/CdS QDs: the reaction time for (a, b), (c, d), (e, f), (g, h), and (i, j) is 10 s, 60 s, 3 min, 10 min, and 20 min, respectively.
